# Supplementary material for: Bexmarilimab-induced macrophage activation leads to treatment benefit in solid tumors: The phase I/II first-in-human MATINS trial
Source: PubMed Central journal article supplement — Cell Rep Med. 2023 Dec 5;4(12):101307. doi: 10.1016/j.xcrm.2023.101307 (PMC10772343; doi:10.1016/j.xcrm.2023.101307), 2023-12-05
Supplement: mmc1.pdf [file mmc1.pdf]

**Cell Reports Medicine, Volume 4**

**Supplemental information**

**Bexmarilimab-induced macrophage activation leads  
to treatment benefit in solid tumors: The phase  
I/II first-in-human MATINS trial**

**Jenna H. Rannikko, Loic Verlingue, Maria de Miguel, Annika Pasanen, Debbie Robbrecht, Tanja Skytta, Sanna Iivanainen, Shishir Shetty, Yuk Ting Ma, Donna M. Graham, Sukeshi Patel Arora, Panu Jaakkola, Christina Yap, Yujuan Xiang, Jami Mandelin, Matti K. Karvonen, Juho Jalkanen, Sinem Karaman, Jussi P. Koivunen, Anna Minchom, Maija Hollmén, and Petri Bono**

## Table of contents

|                                                                                                                             |    |
|-----------------------------------------------------------------------------------------------------------------------------|----|
| Figure S1. MATINS study design.....                                                                                         | 2  |
| Figure S2. Pharmacokinetics, receptor occupancy and target engagement after the first dose of bexmarilimab....              | 3  |
| Figure S3. Preliminary anti-tumor efficiency for bexmarilimab in part I.....                                                | 5  |
| Figure S4. Overall survival analysis according to DC in selected cancer types. ....                                         | 6  |
| Figure S5. Tumor Clever-1 and PD-L1 expression in selected DC and non-DC patients.....                                      | 7  |
| Figure S6. Changes in IFN $\gamma$ levels in cancer cohorts with high DC according to the intratumoral Clever-1 scores..... | 8  |
| Figure S7. GeoMx spatial transcriptomics profiling of pre- and post-treatment tumor biopsies. ....                          | 10 |
| Figure S8. Cell type deconvolution of GeoMx-profiled tumor areas. ....                                                      | 11 |
| Figure S9. GeoMx profiling of biopsy CD68+ area transcriptome after bexmarilimab therapy.....                               | 12 |
| Figure S10. GeoMx profiling of CD31+ and CD68-CD31- tumor area transcriptomes after bexmarilimab therapy.....               | 13 |
| Table S1. Treatment-related adverse events in part I and part II separated by dose.....                                     | 15 |
| Table S2. Treatment-emergent adverse events in part I and part II. ....                                                     | 16 |
| Table S3. Potential immune-related adverse events in part I and part II. ....                                               | 17 |
| Table S4. PFS on bexmarilimab/duration of previous treatment line ratio of > 1.3.....                                       | 18 |

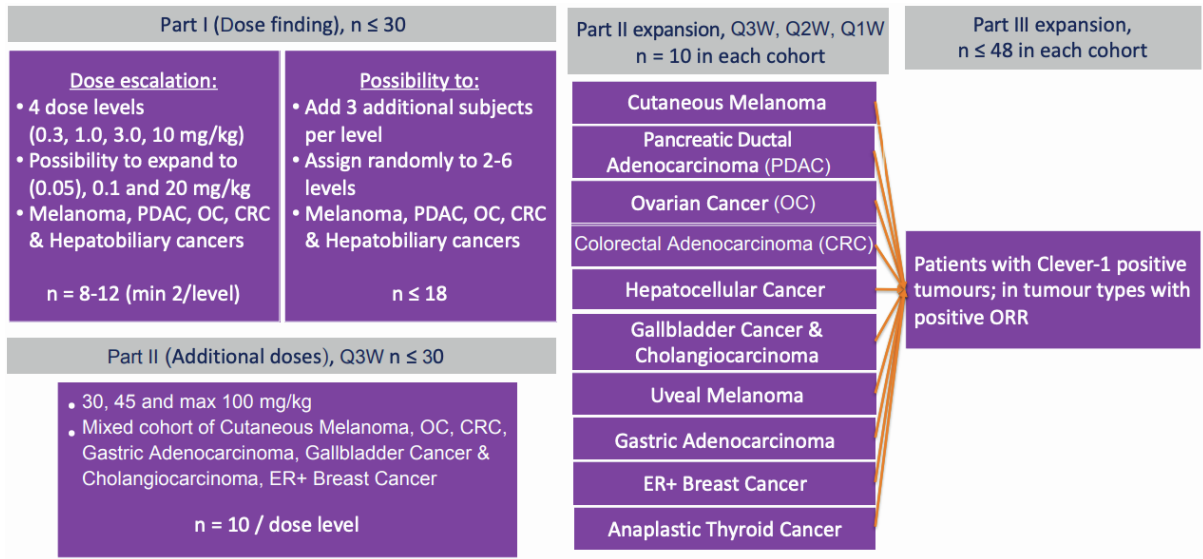

**Figure S1. MATINS study design. Related to STAR methods.**

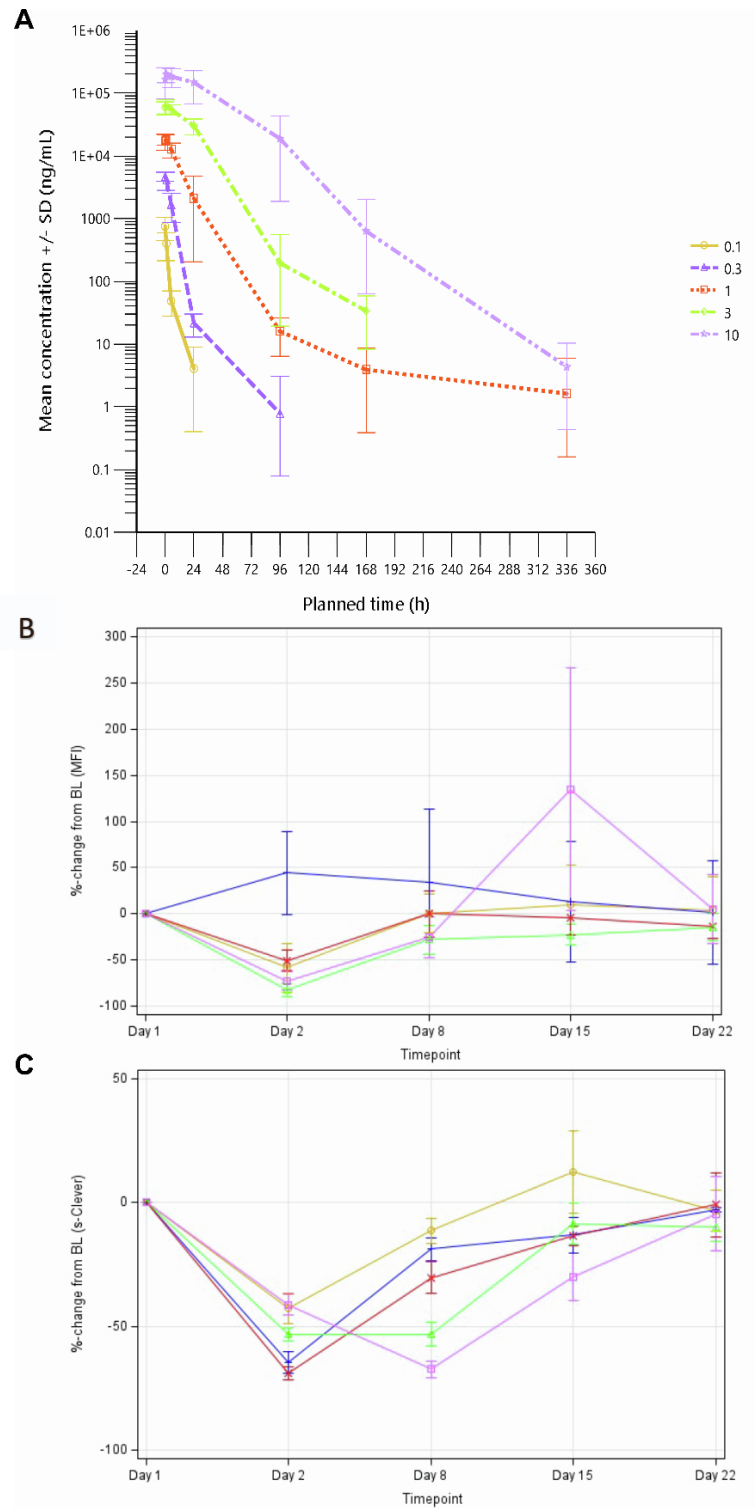

**Figure S2. Pharmacokinetics, receptor occupancy and target engagement after the first dose of bexmarilimab. Related to Figure 1.**

(A) Pharmacokinetics of bexmarilimab. Y-axis is showing the concentration of bexmarilimab while X-axis presents the time in hours from the IMP infusion. (B) Receptor occupancy (RO) of bexmarilimab for Clever-1 on circulating monocytes as measured by decreased cell surface binding of fluorochrome-conjugated bexmarilimab (AF647) competitor antibody in a flow cytometry-based assay. The RO is depicted as %-decrease from baseline samples. Y-axis is percent of change from baseline while Y-axis the time in days from the IMP infusion. No significant differences between doses in the RM ANOVA model were observed, but the changes at day 2 are statistically significant ( $p < 0.05$ ) in all other doses than 0.3 mg/kg. (C) Target engagement of bexmarilimab using circulating soluble Clever-1 as a surrogate marker. Graph showing decreased binding of

biotinylated bexmarilimab in a sandwich ELISA assay. Target engagement is depicted as %-decrease from baseline samples. Y-axis is percent of change from baseline while X-axis the time in days from the IMP infusion. Investigated dose levels were 0.1 (yellow), 0.3 (blue), 1 (red), 3 (green), and 10mg/kg (purple). Significant differences between doses ( $p=0.0098$  for dose effect in RM ANOVA), and also significant interaction between dose and time ( $p<0.0001$  for dose\*time) were observed. For all doses the changes at day 2 are statistically significant ( $p<0.0001$ ). BL, Baseline; IMP, investigational medicinal product; MFI, median fluorescence intensity; s-Clever, soluble Clever-1.

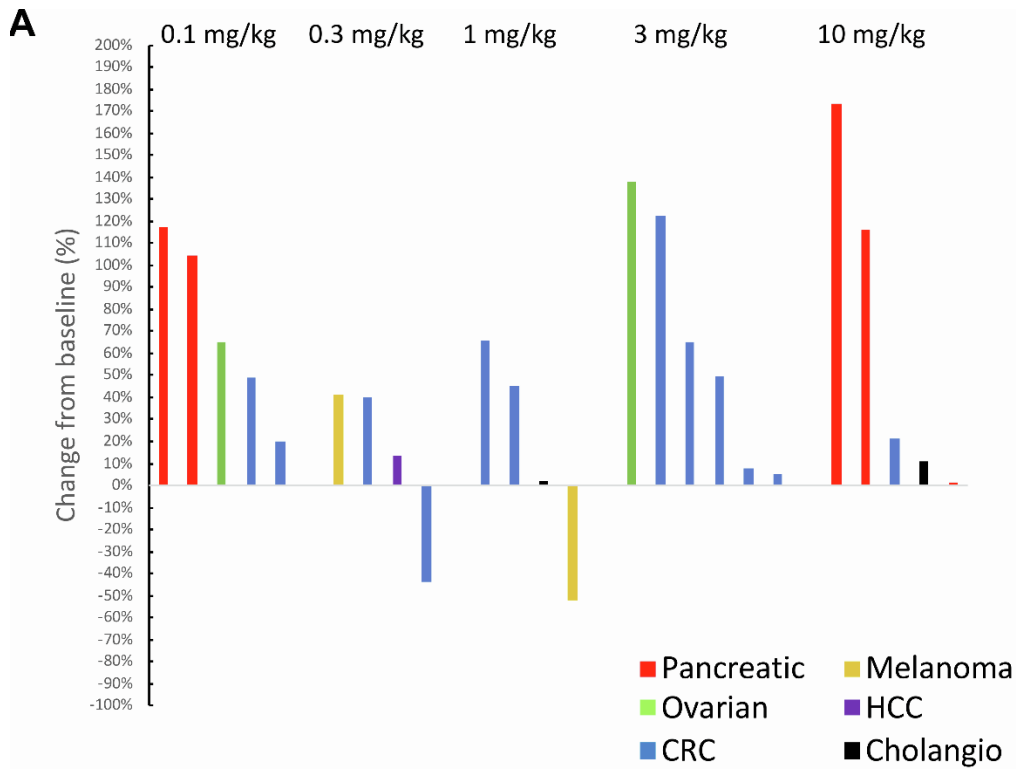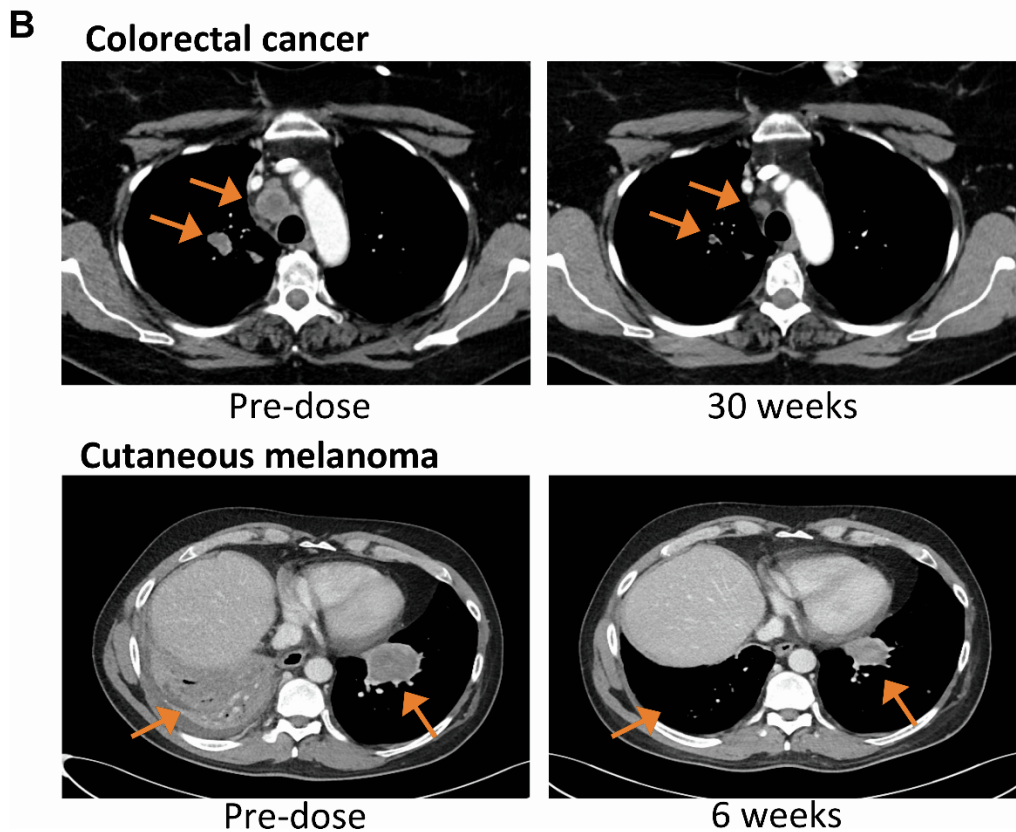

**Figure S3. Preliminary anti-tumor efficacy for bexmarilimab in part I. Related to Table 3.**

(A) Waterfall plot for the best target lesion responses (%) according to dose and tumor type in RECIST 1.1 evaluable patients (n=24). (B) CT-scans for the selected responding patients in baseline and at the time of the best response. Colorectal cancer patient with PR and melanoma patient with PR in target lesions are presented. CRC, colorectal cancer; HCC, hepatocellular cancer; PR, partial response.

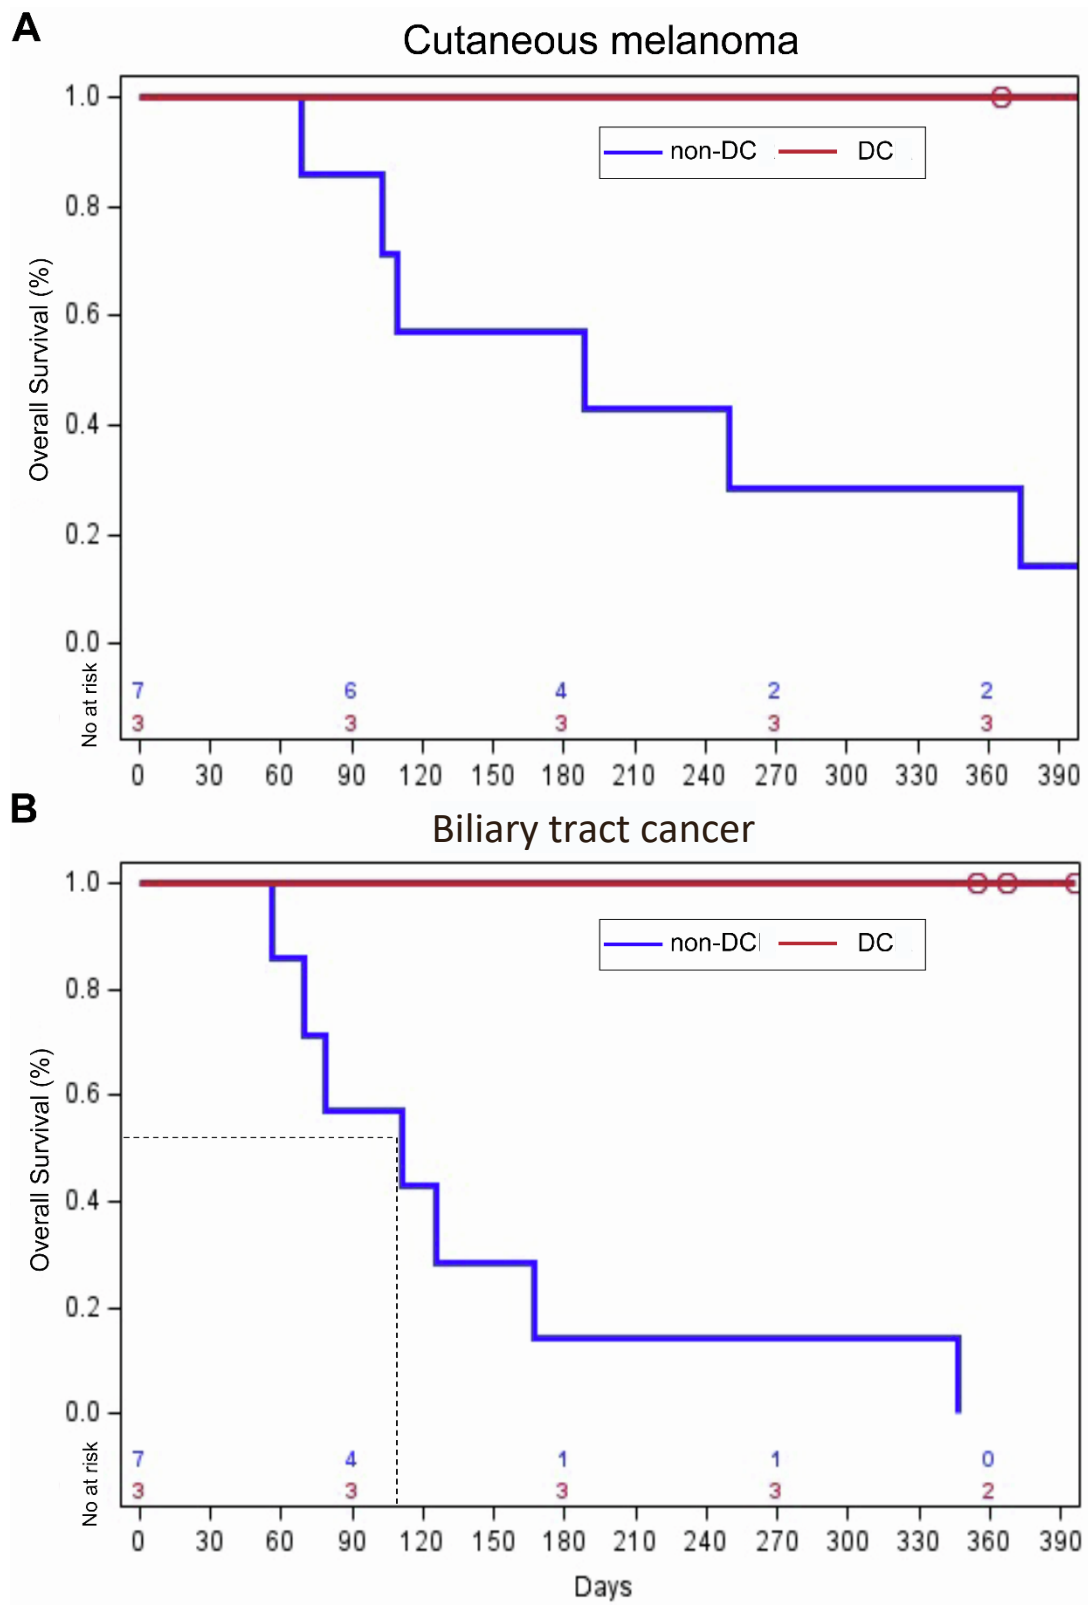

**Figure S4. Overall survival analysis according to DC in selected cancer types. Related to Figure 1.** (A-B) Overall survival according to DC in cutaneous melanoma (A) and biliary tract cancer (B). Circles indicate censored events. DC, disease control.

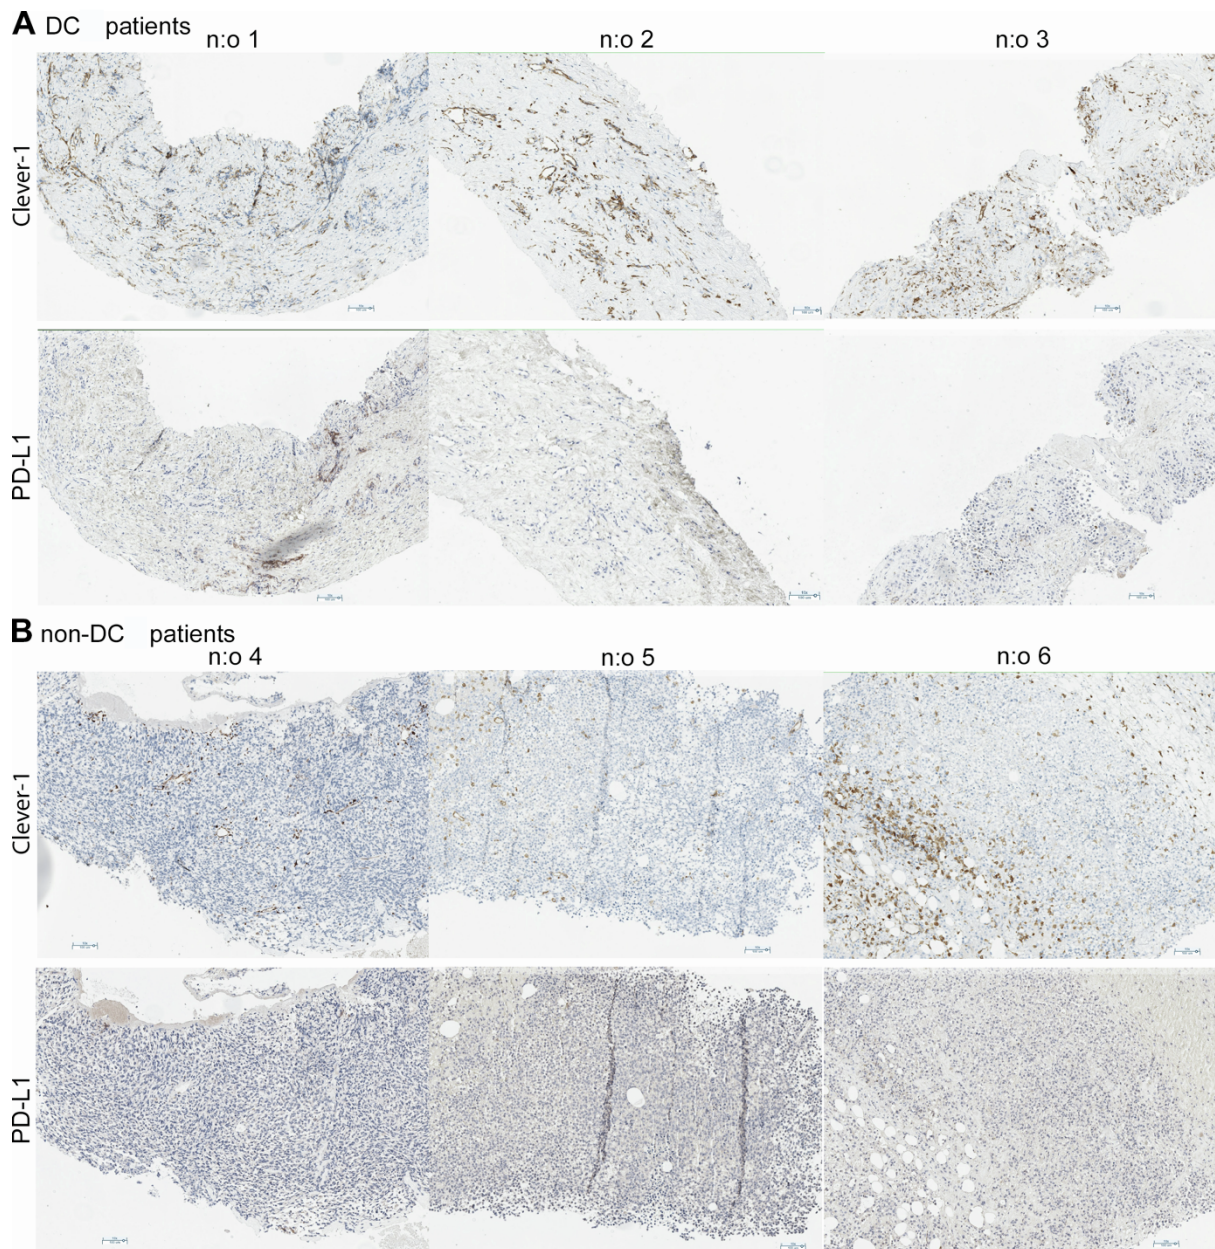

**Figure S5. Tumor Cleaver-1 and PD-L1 expression in selected DC and non-DC patients. Related to Table 4.**

(A-B) Immunohistochemical staining of pre-treatment tumor samples for Cleaver-1 and PD-L1 in selected DC patients (A, 1-3) and non-DC patients (B, 4-6). Line segments 100  $\mu$ m. DC, disease control.



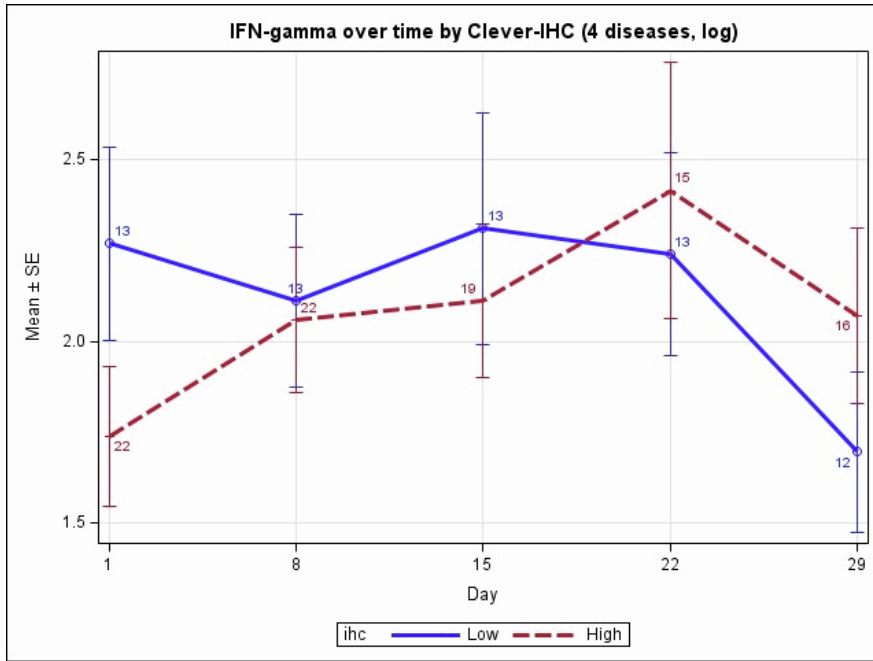

**Figure S6. Changes in IFN $\gamma$  levels in cancer cohorts with high DC according to the intratumoral Clever-1 scores. Related to Figure 1 and Table 4.**

Significant increases of IFN $\gamma$  ( $p=0.018$ ) were observed in Clever-1 high (cut-off 3%) patients compared to Clever-1 low patients during the first cycle of treatment using RM ANOVA model.

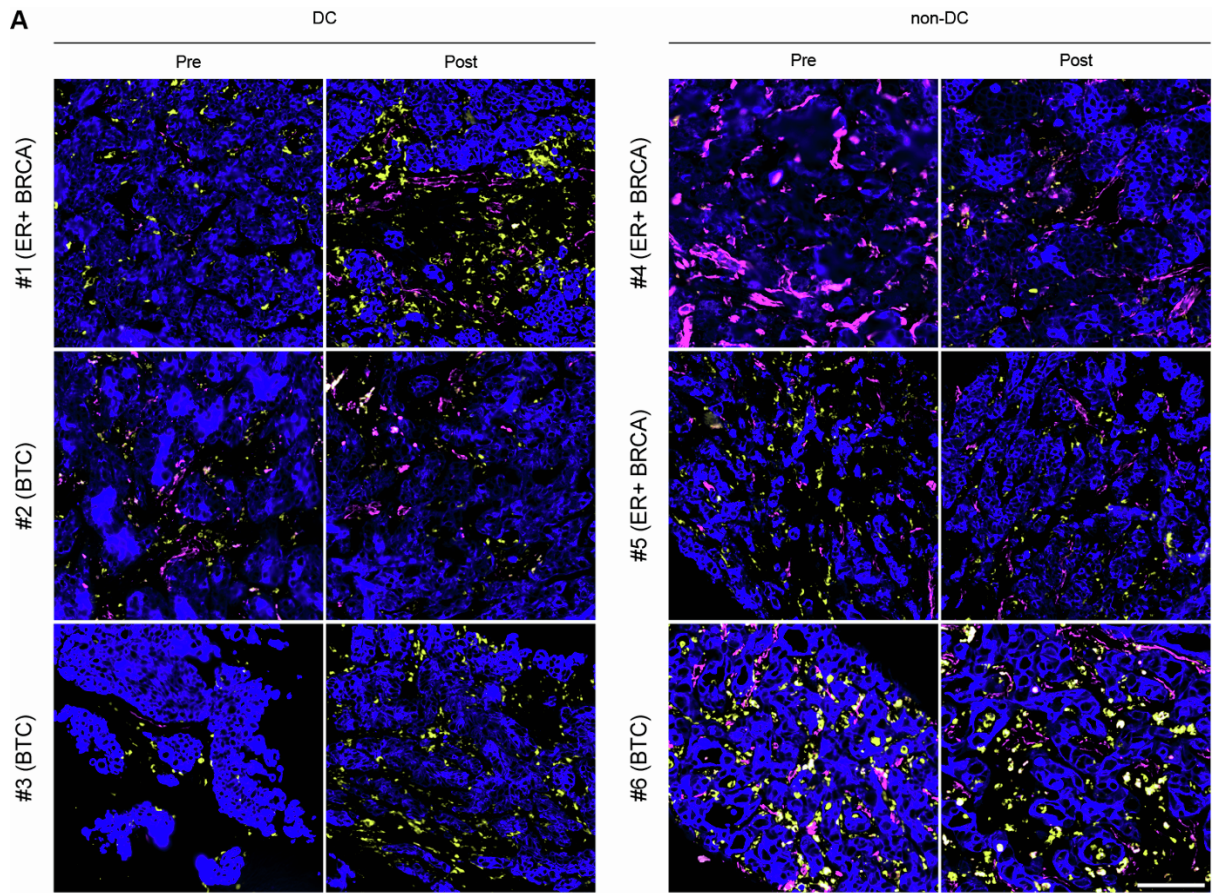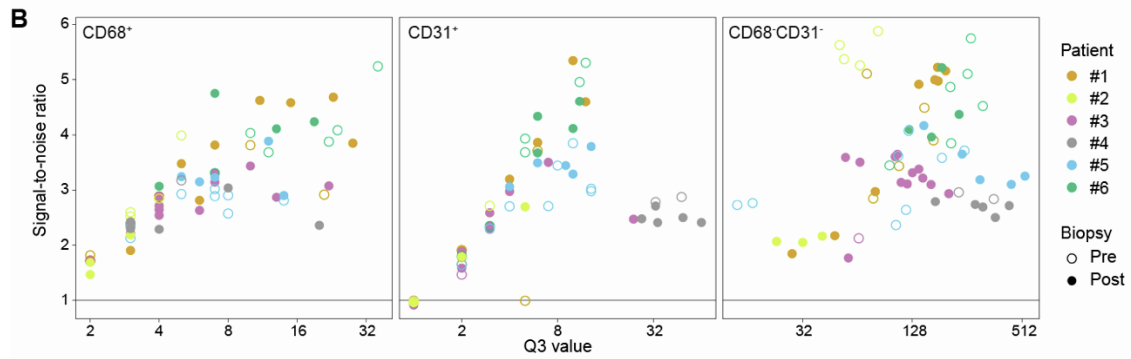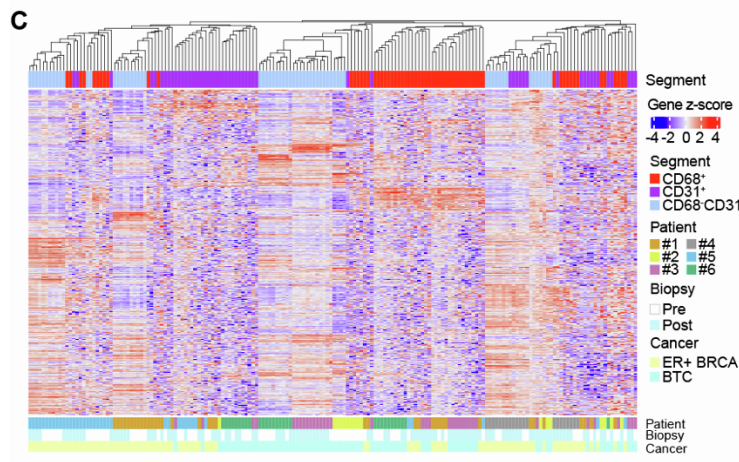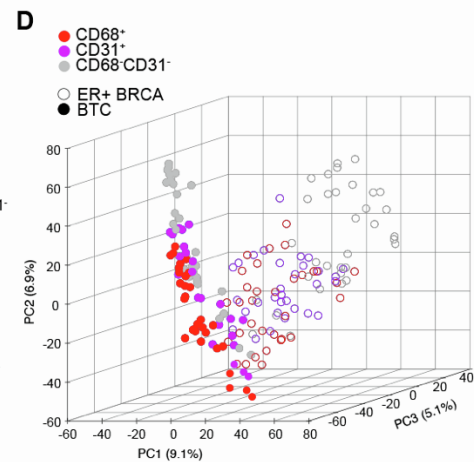

**Figure S7. GeoMx spatial transcriptomics profiling of pre- and post-treatment tumor biopsies. Related to Figure 2.**

(A) Morphology marker staining for GeoMx analysis (n = 6 patients) showing CD68<sup>+</sup> macrophages (yellow), CD31<sup>+</sup> vessels (magenta) and pan-cytokeratin<sup>+</sup> cancer cells (blue). Images of representative ROIs were selected based on CD68 staining in each biopsy and 400 $\mu$ m  $\times$  400 $\mu$ m square regions are displayed from the center of the ROIs. Scale bar 100  $\mu$ m. (B) Signal-to-noise ratio (Q3 value / geoMean[NegativeProbes]) is shown separately for CD68<sup>+</sup>, CD31<sup>+</sup> and CD68<sup>-</sup>CD31<sup>-</sup> segments with points representing analyzed ROIs. Segments with signal-to-noise ratio  $\leq 1$  were excluded from further analyses. (C-D) Clustering of all QC-passing segments (n = 180) based on Q3-normalized and log<sub>2</sub>-transformed counts (n = 10,612 genes). Heatmap of unsupervised hierarchical clustering with columns representing segments (C) and a scatter plot of the first three principal components with each point representing a single segment (D). BTC, biliary tract cancer; ER+ BRCA, estrogen receptor positive breast cancer; DC, disease control; Pre, pre-treatment biopsy; Post, post-treatment biopsy; Q3, 75<sup>th</sup> percentile of counts; ROI, region of interest.

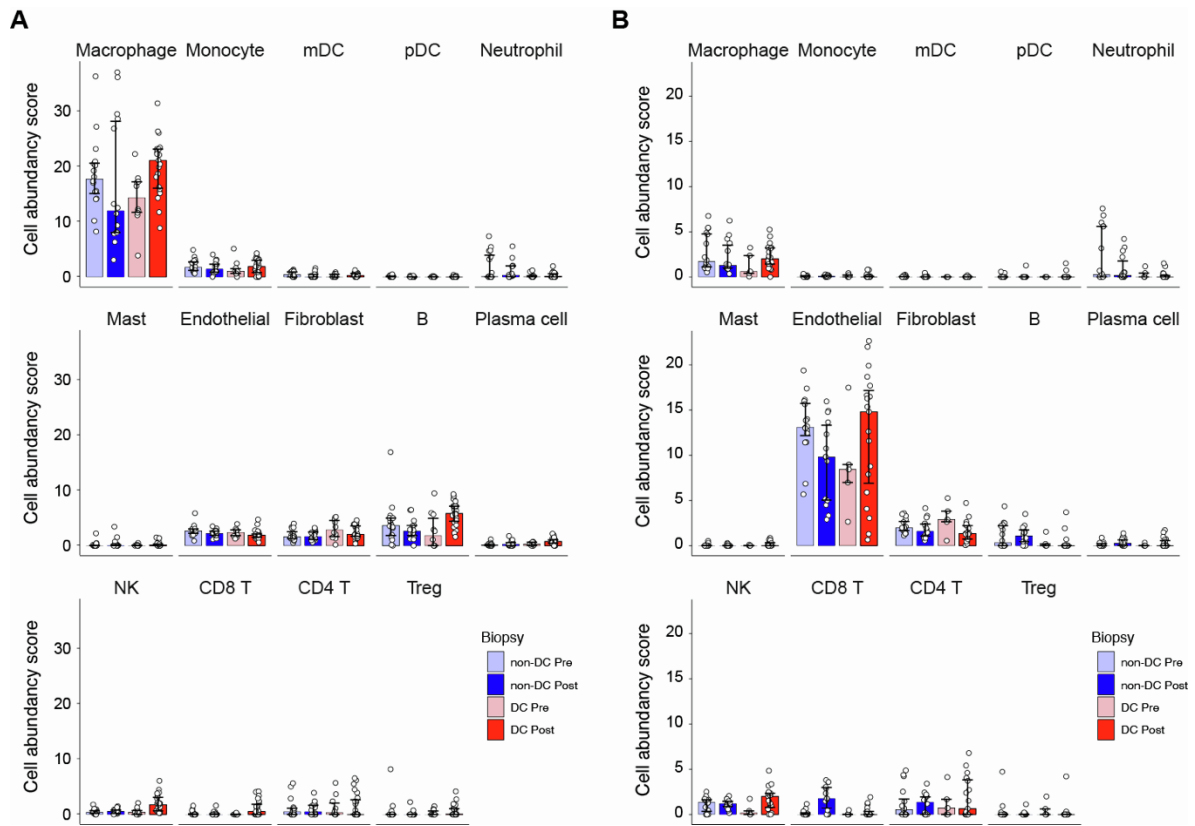

**Figure S8. Cell type deconvolution of GeoMx-profiled tumor areas. Related to Figure 2.**

(A-B) Cell abundance scores for the indicated cell types were calculated based on Q3-normalized gene expression from CD68<sup>+</sup> (A) and CD31<sup>+</sup> (B) tumor areas using SpatialDecon. Each point represents a single ROI, n = 3 patients per group. Median ± interquartile range. DC, disease control; NK, natural killer cell; mDC, myeloid dendritic cell; pDC, plasmacytoid dendritic cell; Treg, regulatory T-cell; Pre, pre-treatment biopsy; Post, post-treatment biopsy; ROI, region of interest.

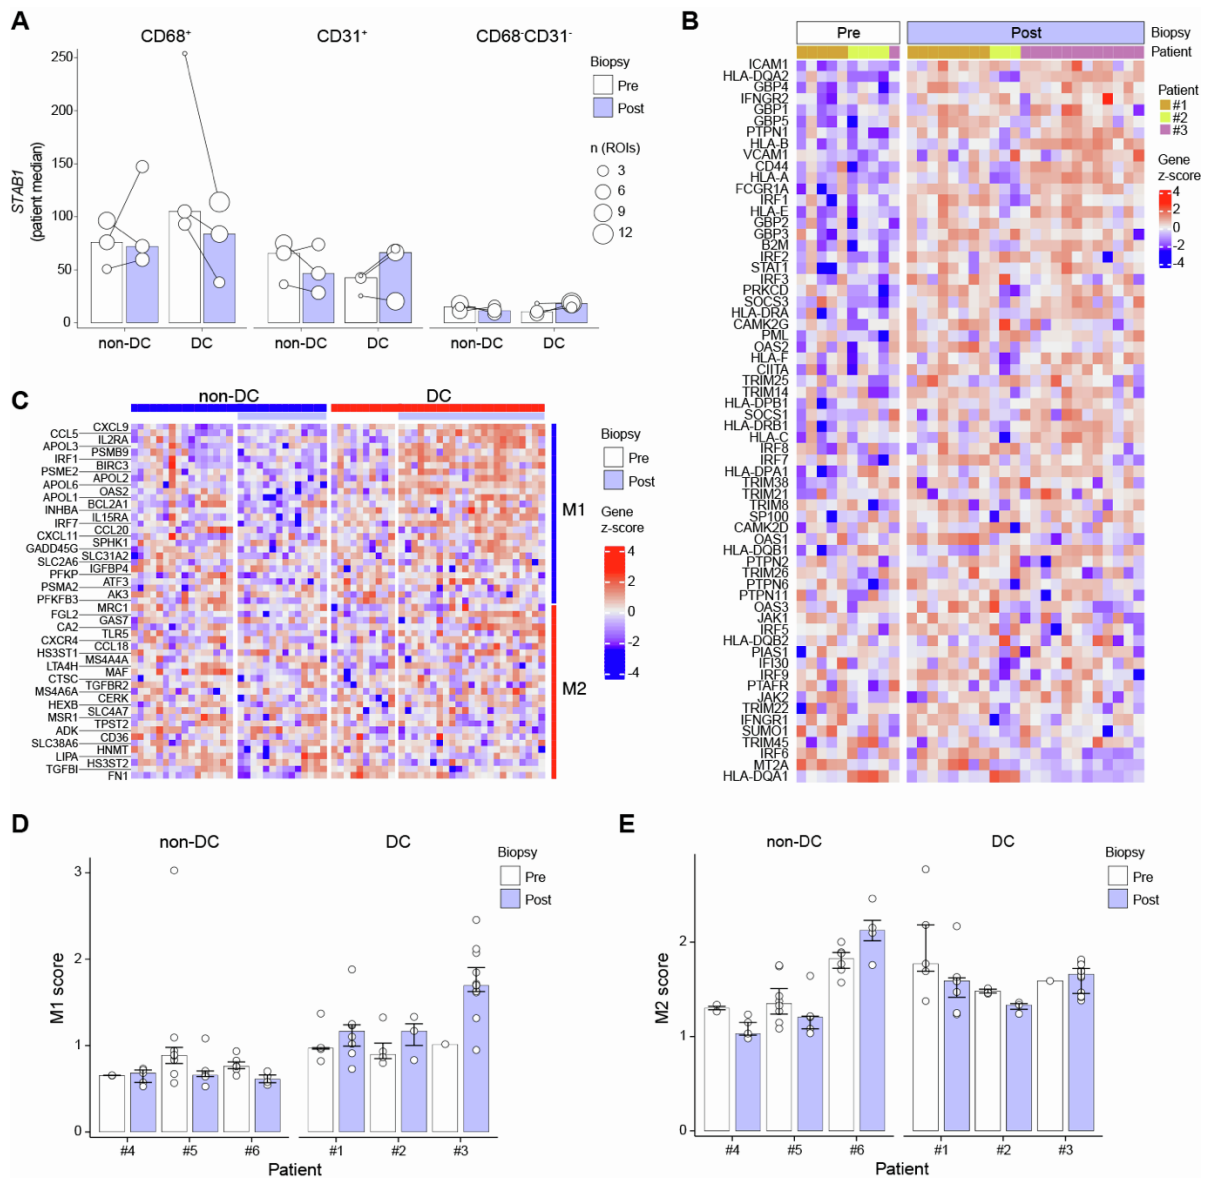

**Figure S9. GeoMx profiling of biopsy CD68<sup>+</sup> area transcriptome after bexmarilimab therapy. Related to Figure 2.**

(A) Clever-1 mRNA (*STAB1*) levels in CD68<sup>+</sup>, CD31<sup>+</sup> and CD68<sup>+</sup>CD31<sup>-</sup> areas of DC and non-DC patient biopsies. Points indicate median expression across patient's ROIs and bars represent patient group median. (B) Expression levels of interferon gamma signaling pathway genes measured from CD68<sup>+</sup> areas of DC patient biopsies. (C) Heatmap of M1 and M2 macrophage marker gene expression levels calculated from CD68<sup>+</sup> biopsy areas. In (B-C), color gradient represents gene z-scores calculated from Q3-normalized and log<sub>2</sub>-transformed counts with red corresponding to higher expression, and columns represent individual ROIs. (D-E) Bar graphs of M1 (D) and M2 (E) scores calculated based on mean expression level of macrophage marker genes shown in (C). Score of 1 indicates marker gene expression level equal to overall gene expression level on CD68<sup>+</sup> biopsy area. Median ± interquartile range, points represent individual ROIs. DC, disease control; Pre, pre-treatment biopsy; Post, post-treatment biopsy, ROI: region of interest.

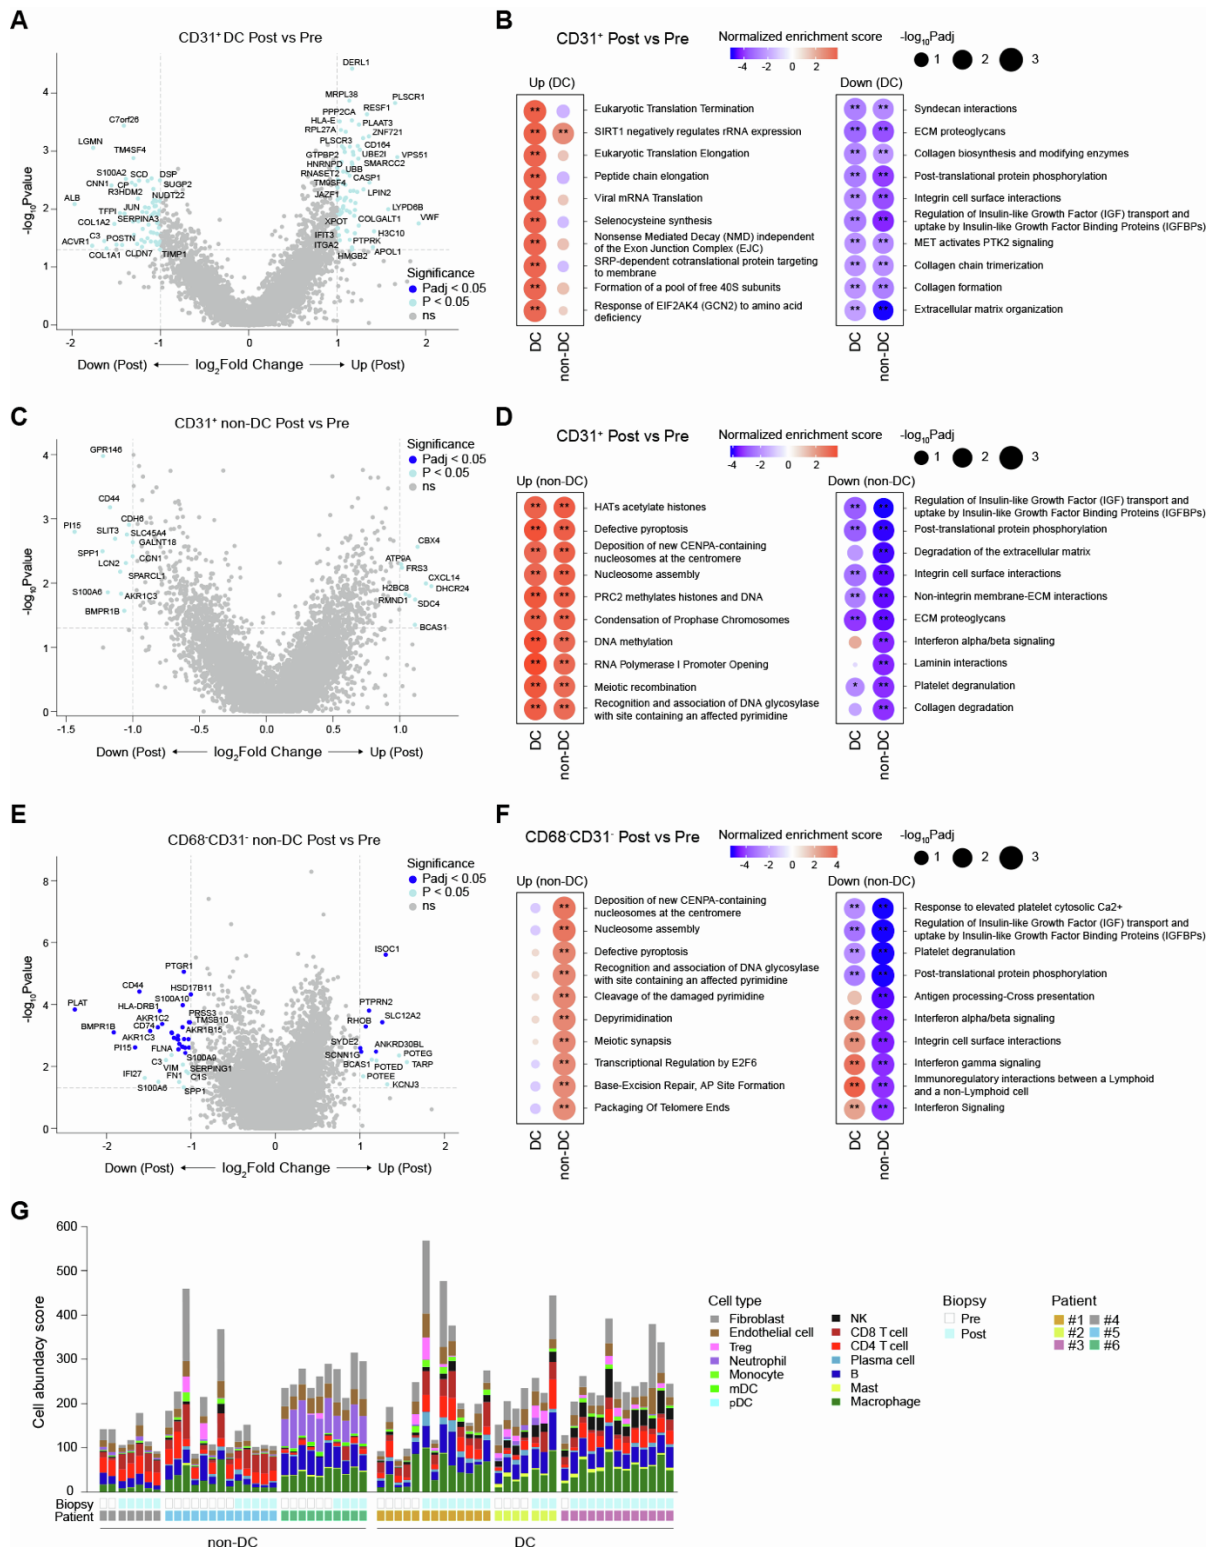

**Figure S10. GeoMx profiling of CD31<sup>+</sup> and CD68<sup>+</sup>CD31<sup>-</sup> tumor area transcriptomes after bexmarilimab therapy. Related to Figure 3.**

(A-F) Analysis of gene expression changes after bexmarilimab therapy in CD31<sup>+</sup> tumor areas of DC patients (A-B), CD31<sup>+</sup> tumor areas of non-DC patients (C-D) and CD68<sup>+</sup>CD31<sup>-</sup> tumor areas of non-DC patients (E-F), n = 3 patients per group with paired biopsies. Volcano plots show differentially expressed genes (A, C and E) and bubble plots top up- and downregulated pathways (B, D and F; gene set enrichment analysis). In B, D, and F, red color denotes pathway activation and blue downregulation. (G), Cell abundance scores for the indicated cell types were calculated based on Q3-normalized gene expression on CD68<sup>+</sup>CD31<sup>-</sup> area using SpatialDecon. Each stacked

bar represents a single ROI. DC, disease control; Pre, pre-treatment biopsy; Post, post-treatment biopsy; ROI, region of interest. Padj, Benjamini-Hochberg-adjusted p-value; \*, Padj < 0.05; \*\*, Padj < 0.01; ns, not significant.

**Table S1. Treatment-related adverse events in part I and part II separated by dose. Related to Table 2.**

|                                             | <b>Dose (mg/kg)</b> | <b>0.1</b> | <b>0.3</b> | <b>1.0</b> | <b>3.0</b> | <b>10</b> | <b>Total</b> |
|---------------------------------------------|---------------------|------------|------------|------------|------------|-----------|--------------|
|                                             |                     | (n = 5)    | (n = 13)   | (n = 97)   | (n = 17)   | (n = 6)   | (n = 138)    |
|                                             |                     | n (%)      | n (%)      | n (%)      | n (%)      | n (%)     | n (%)        |
| <b>Any</b>                                  |                     | 3 (60.0)   | 8 (61.5)   | 49 (50.5)  | 6 (35.3)   | 3 (50.0)  | 69 (50.0)    |
| <b>Blood and lymphatic system disorders</b> |                     |            |            |            |            |           |              |
| Anemia                                      |                     | 1 (20.0)   | 0 (0.0)    | 6 (6.2)    | 1 (5.9)    | 0 (0.0)   | 8 (5.8)      |
| <b>Gastrointestinal disorders</b>           |                     |            |            |            |            |           |              |
| Nausea                                      |                     | 1 (20.0)   | 1 (7.7)    | 5 (5.2)    | 0 (0.0)    | 0 (0.0)   | 7 (5.1)      |
| Vomiting                                    |                     | 0 (0.0)    | 0 (0.0)    | 4 (4.1)    | 0 (0.0)    | 0 (0.0)   | 4 (2.9)      |
| <b>General disorders</b>                    |                     |            |            |            |            |           |              |
| Fatigue                                     |                     | 1 (20.0)   | 5 (38.5)   | 14 (14.4)  | 2 (11.8)   | 1 (16.7)  | 23 (16.7)    |
| Pyrexia                                     |                     | 1 (20.0)   | 2 (15.4)   | 6 (6.2)    | 2 (11.8)   | 1 (16.7)  | 12 (8.7)     |
| <b>Investigations</b>                       |                     |            |            |            |            |           |              |
| Blood alkaline phosphatase increased        |                     | 0 (0.0)    | 0 (0.0)    | 5 (5.2)    | 2 (11.8)   | 0 (0.0)   | 7 (5.1)      |
| Alanine aminotransferase increased          |                     | 0 (0.0)    | 0 (0.0)    | 3 (3.1)    | 1 (5.9)    | 0 (0.0)   | 4 (2.9)      |
| Aspartate aminotransferase increased        |                     | 0 (0.0)    | 0 (0.0)    | 2 (2.1)    | 2 (11.8)   | 0 (0.0)   | 4 (2.9)      |
| <b>Metabolism and nutrition disorders</b>   |                     |            |            |            |            |           |              |
| Decreased appetite                          |                     | 0 (0.0)    | 0 (0.0)    | 3 (3.1)    | 1 (5.9)    | 0 (0.0)   | 4 (2.9)      |

\*Included are treatment-related adverse events with National Cancer Institute-Common Terminology Criteria for Adverse Events (NCI-CTCAE) version 5.0 that occurred in at least four patients.



**Table S2. Treatment-emergent adverse events in part I and part II. Related to Table 2.**

| Treatment-emergent adverse event*                           | All grades<br>(n=138) | Grade $\geq$ 3<br>(n=138) |
|-------------------------------------------------------------|-----------------------|---------------------------|
|                                                             | number (percent)      |                           |
| <b>Any</b>                                                  | 138 (100.0)           | 111 (80.4)                |
| <b>Blood and lymphatic system disorders</b>                 |                       |                           |
| Anemia                                                      | 32 (23.2)             | 8 (5.8)                   |
| <b>Gastrointestinal disorders</b>                           |                       |                           |
| Abdominal pain                                              | 33 (23.9)             | 4 (2.9)                   |
| Constipation                                                | 24 (17.4)             | 1 (0.7)                   |
| Nausea                                                      | 21 (15.2)             | 0                         |
| Diarrhea                                                    | 16 (11.6)             | 0                         |
| Vomiting                                                    | 15 (10.9)             | 1 (0.7)                   |
| Ascites                                                     | 13 (9.4)              | 8 (5.8)                   |
| Intestinal obstruction                                      | 3 (3.1)               | 3 (2.2)                   |
| Small intestinal obstruction                                | 2 (1.4)               | 2 (1.4)                   |
| Large intestinal obstruction                                | 2 (1.4)               | 2 (1.4)                   |
| Ileus                                                       | 2 (1.4)               | 2 (1.4)                   |
| <b>General disorders and administration site conditions</b> |                       |                           |
| Fatigue                                                     | 51 (37.0)             | 4 (2.9)                   |
| Pyrexia                                                     | 20 (14.5)             | 0                         |
| Edema peripheral                                            | 7 (5.1)               | 0                         |
| Death                                                       | 7 (5.1)               | 7 (5.1)                   |
| General physical health deterioration                       | 4 (2.9)               | 3 (2.2)                   |
| <b>Hepatobiliary disorders</b>                              |                       |                           |
| Cholestasis                                                 | 6 (4.3)               | 0                         |
| Hepatic failure                                             | 2 (1.4)               | 2 (1.4)                   |
| <b>Infections and infestations</b>                          |                       |                           |
| Pneumonia                                                   | 3 (2.2)               | 2 (1.4)                   |
| <b>Investigations</b>                                       |                       |                           |
| Blood alkaline phosphatase increased                        | 21 (15.2)             | 3 (2.2)                   |
| Aspartate aminotransferase increased                        | 17 (12.3)             | 3 (2.2)                   |
| Alanine aminotransferase increased                          | 16 (11.6)             | 1 (0.7)                   |
| Blood bilirubin increased                                   | 8 (5.8)               | 3 (2.2)                   |
| Transaminases increased                                     | 3 (2.2)               | 3 (2.2)                   |
| <b>Metabolism and nutrition disorders</b>                   |                       |                           |
| Decreased appetite                                          | 24 (17.4)             | 0                         |
| Hyperglycemia                                               | 6 (4.3)               | 3 (2.2)                   |
| Hyponatremia                                                | 5 (3.6)               | 2 (1.4)                   |
| <b>Musculoskeletal and connective tissue disorders</b>      |                       |                           |
| Back pain                                                   | 13 (9.4)              | 2 (1.4)                   |
| Flank pain                                                  | 9 (6.5)               | 0                         |
| Myalgia                                                     | 6 (4.3)               | 0                         |
| Pain in extremity                                           | 5 (3.6)               | 0                         |
| Arthralgia                                                  | 5 (3.6)               | 0                         |
| <b>Neoplasms benign, malignant, and unspecified</b>         |                       |                           |
| Tumor pain                                                  | 4 (2.9)               | 2 (1.4)                   |
| <b>Nervous system disorders</b>                             |                       |                           |
| Headache                                                    | 8 (5.8)               | 0                         |
| Dizziness                                                   | 5 (3.6)               | 0                         |
| <b>Psychiatric disorders</b>                                |                       |                           |
| Insomnia                                                    | 7 (5.1)               | 0                         |
| <b>Respiratory, thoracic and mediastinal disorders</b>      |                       |                           |
| Dyspnea                                                     | 13 (9.4)              | 1 (0.7)                   |
| Cough                                                       | 6 (4.3)               | 0                         |
| Pleural effusion                                            | 4 (2.9)               | 3 (2.2)                   |
| <b>Vascular disorders</b>                                   |                       |                           |
| Hypertension                                                | 4 (2.9)               | 2 (1.4)                   |

\*Included are treatment-emergent adverse events that occurred in at least five patients or treatment-emergent grade  $\geq$ 3 adverse events that occurred in at least two patients.

**Table S3. Potential immune-related adverse events in part I and part II. Related to Table 2.**

| Subject | Dose (mg/kg) | Adverse event preferred term         | irAE class      | Onset date (cycle) | Severity | Relationship to study drug |
|---------|--------------|--------------------------------------|-----------------|--------------------|----------|----------------------------|
| #1      | 0.3          | Rash erythematous                    | Dermatitis      | Day 110(C5D1)      | Grade 1  | Possibly related           |
| #1      | 0.3          | Hyperthyroidism                      | Thyroiditis     | Day 133 (C7D1)     | Grade 1  | Possibly related           |
| #1      | 0.3          | Pneumonitis                          | Pneumonitis     | Day 133 (C7D1)     | Grade 1  | Probably related           |
| #1      | 0.3          | Hand dermatitis                      | Dermatitis      | Day 153 (C8D1)     | Grade 1  | Possibly related           |
| #1      | 0.3          | Hypothyroidism                       | Dermatitis      | Day 176 (C8D1)     | Grade 2  | Possibly related           |
| #1      | 0.3          | Hand dermatitis                      | Dermatitis      | Day 181 (C8D1)     | Grade 2  | Possibly related           |
| #1      | 0.3          | Myositis                             | Myositis        | Day 181 (C8D1)     | Grade 2  | Probably related           |
| #1      | 0.3          | Autoimmune thyroiditis               | Thyroiditis     | Day 181 (C8D1)     | Grade 2  | Probably related           |
| #1      | 0.3          | Rash erythematous                    | Dermatitis      | Day 217 (C8D1)     | Grade 1  | Possibly related           |
| #2      | 3            | Aspartate aminotransferase increased | Hepatitis       | Day 71 (C3D1)      | Grade 1  | Possibly related           |
| #2      | 3            | Alanine aminotransferase increased   | Hepatitis       | Day 71 (C3D1)      | Grade 2  | Possibly related           |
| #2      | 3            | Drug-induced liver injury            | Hepatitis       | Day 240(C11D1)     | Grade 4  | Probably related           |
| #3      | 0.3          | Alanine aminotransferase increased   | Hepatitis       | Day 65 (C3D1)      | Grade 2  | Possibly related           |
| #3      | 0.3          | Aspartate aminotransferase increased | Hepatitis       | Day 65 (C3D1)      | Grade 2  | Possibly related           |
| #4      | 1            | Diarrhea                             | Colitis         | Day 78 (C4D1)      | Grade 1  | Possibly related           |
| #4      | 1            | Pancreatic failure                   | Pancreatitis    | Day 122 (C5D1)     | Grade 2  | Possibly related           |
| #5      | 1            | Hepatic failure                      | Hepatitis       | Day 33 (C2D1)      | Grade 4  | Probably related           |
| #6      | 1            | Hyperparathyroidism                  | Parathyroiditis | Day 22 (C1D1)      | Grade 1  | Possibly related           |
| #7      | 1            | Aspartate aminotransferase increased | Hepatitis       | Day 43 (C1D1)      | Grade 1  | Probably related           |
| #7      | 1            | Alanine aminotransferase increased   | Hepatitis       | Day 64 (C3D1)      | Grade 1  | Probably related           |
| #8      | 3            | Aspartate aminotransferase increased | Hepatitis       | Day 22 (C1D1)      | Grade 1  | Possibly related           |
| #8      | 3            | Diarrhea                             | Colitis         | Day 27(C2D1)       | Grade 1  | Possibly related           |
| #8      | 3            | Rash macular                         | Dermatitis      | Day 54 (C3D1)      | Grade 2  | Possibly related           |
| #9      | 1            | Hypothyroidism                       | Thyroiditis     | Day 64 (C3D1)      | Grade 2  | Possibly related           |
| #10     | 1            | Transaminases increased              | Hepatitis       | Day 22 (C1D1)      | Grade 4  | Probably related           |

irAE, immune-related adverse event.

**Table S4. PFS on bexmarlimab/duration of previous treatment line ratio of > 1.3. Related to Figure 1.**

|        |     | <b>n (%)</b> | <b>p-value*</b> |
|--------|-----|--------------|-----------------|
| All    |     | 130 (100)    |                 |
|        | Yes | 21 (16)      |                 |
|        | No  | 109 (84)     |                 |
| Non-DC |     | 111 (100)    |                 |
|        | Yes | 13 (12)      |                 |
|        | No  | 99 (88)      |                 |
| DC     |     | 19 (100)     |                 |
|        | Yes | 8 (42)       | 0.0031          |
|        | No  | 11 (58)      |                 |

DC, disease control; PFS, progression-free survival; \*Two-sided Fisher's exact test.
